# Supplementary material
Source: ML conference proceedings conference paper supplement (https://openreview.net/forum?id=nJq5z21eUk)

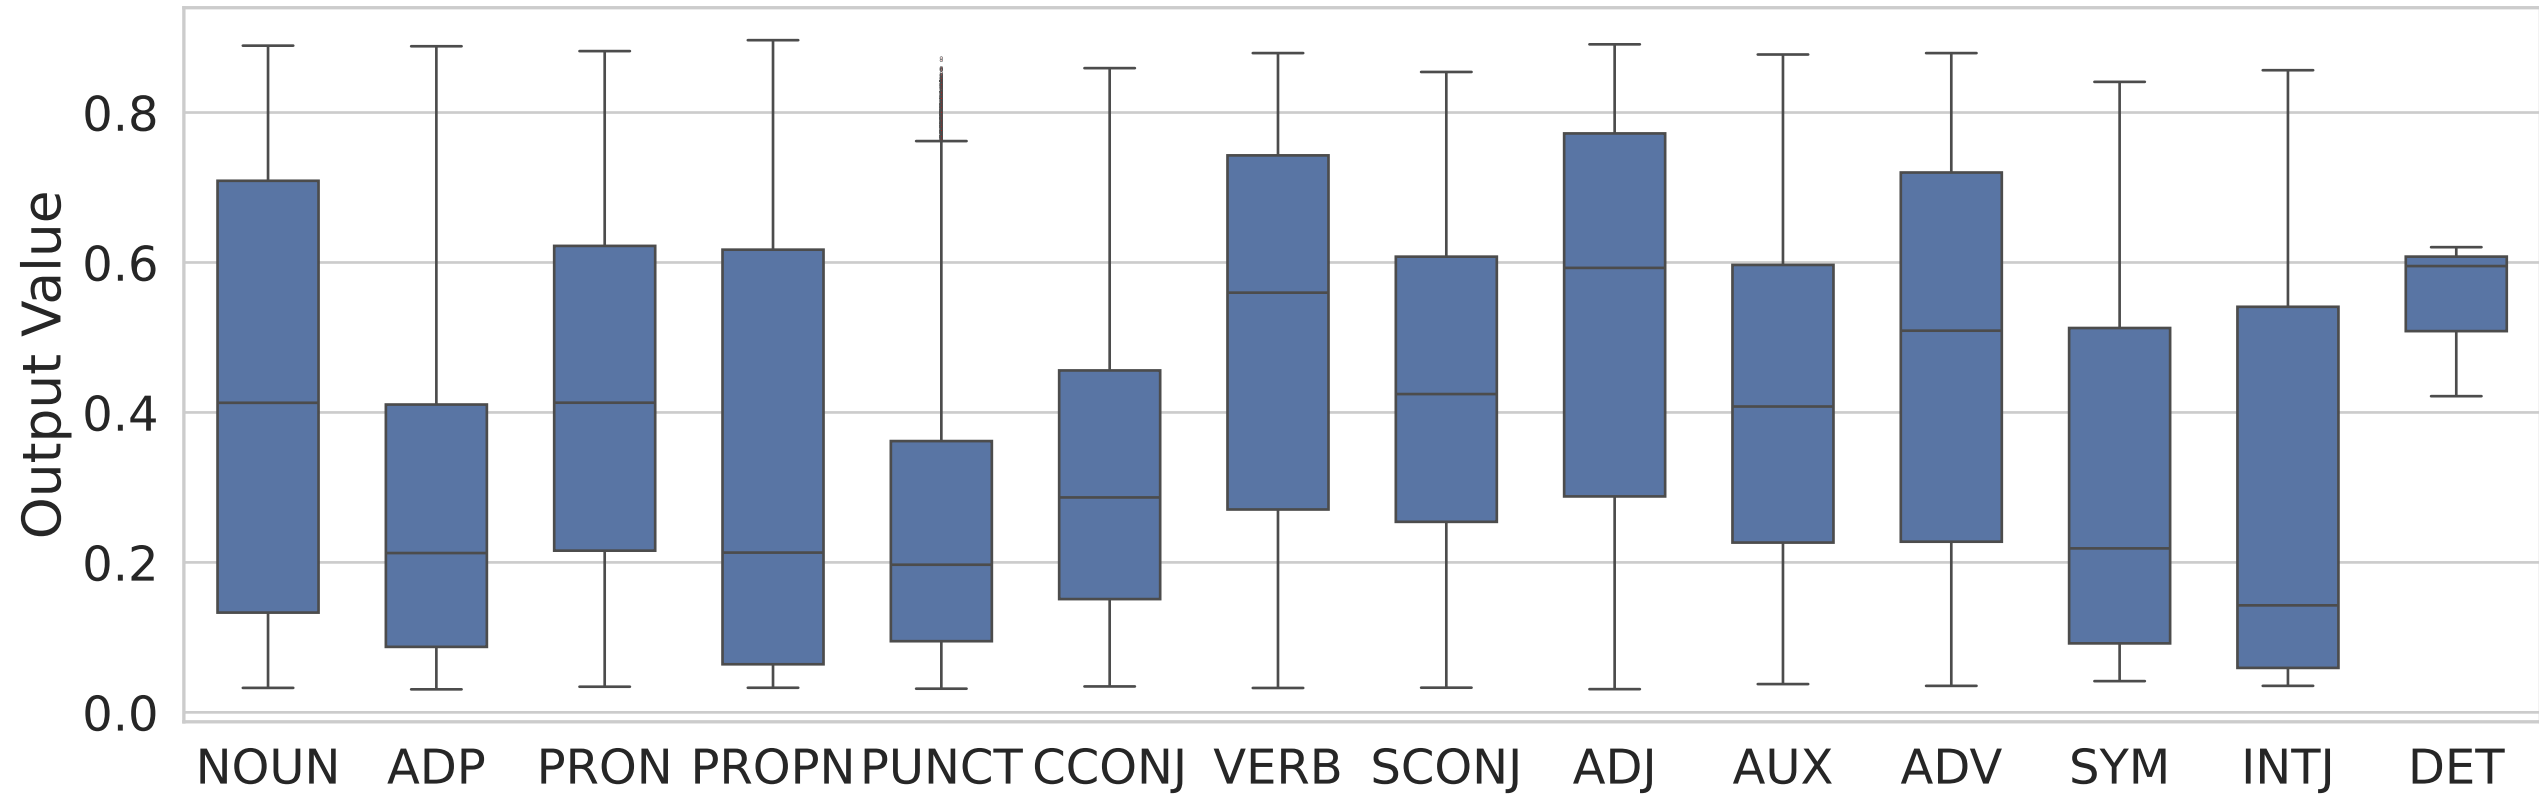

Supplement: supplementary_material [file boxplot.pdf › LTW/eval/boxplot.pdf]

# ROC Curves on GPTJ-6B

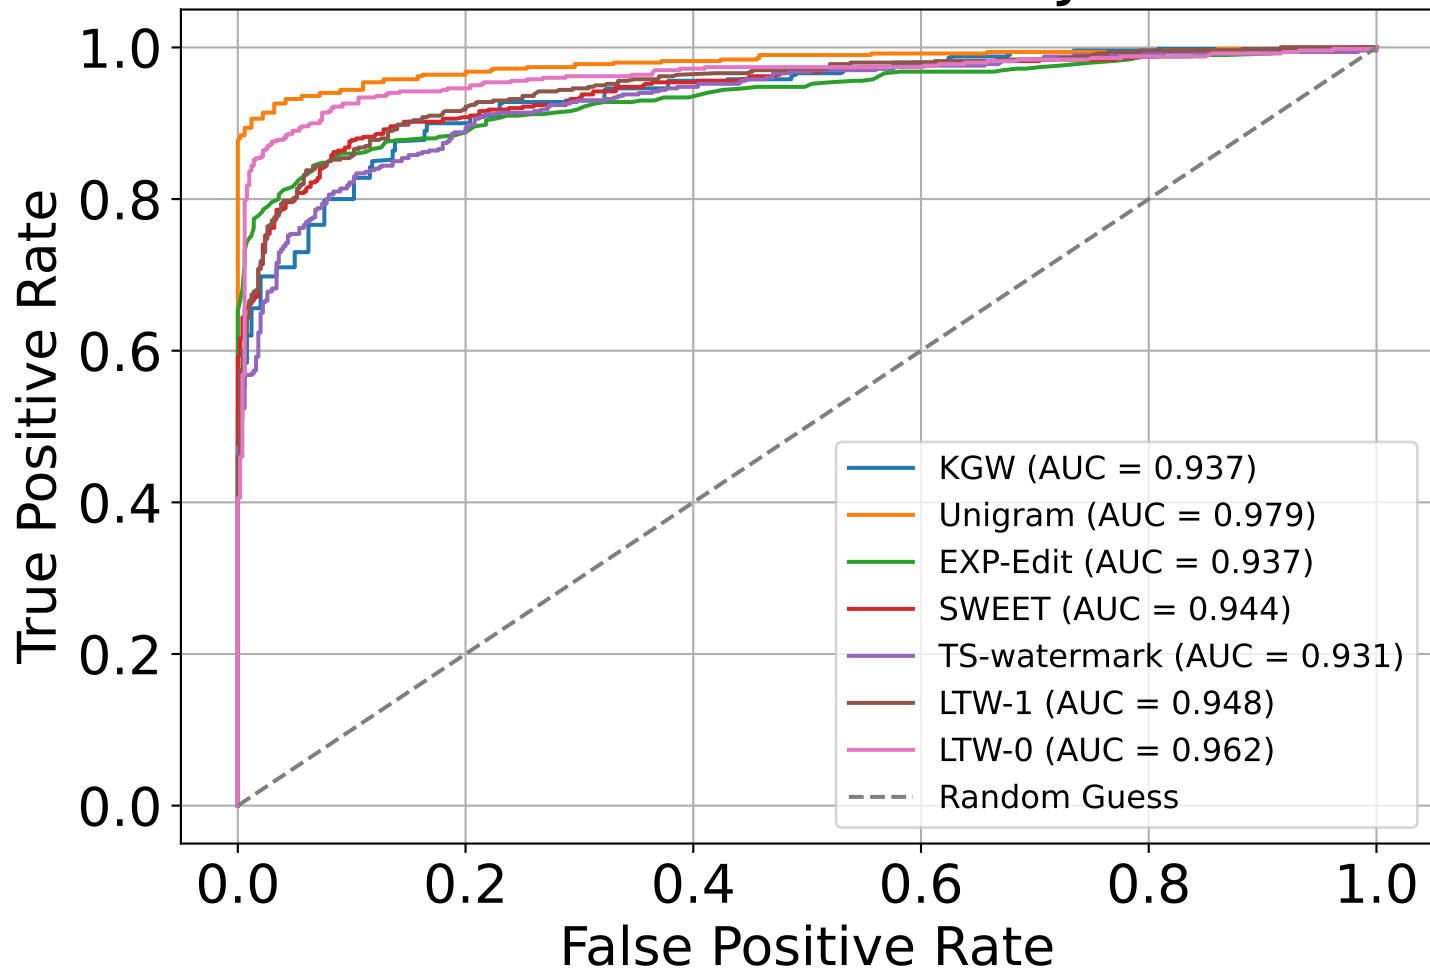

Supplement: supplementary_material [file dipper_auroc_gptj.pdf › LTW/eval/dipper_auroc_gptj.pdf]

# ROC Curves on OPT-6.7B

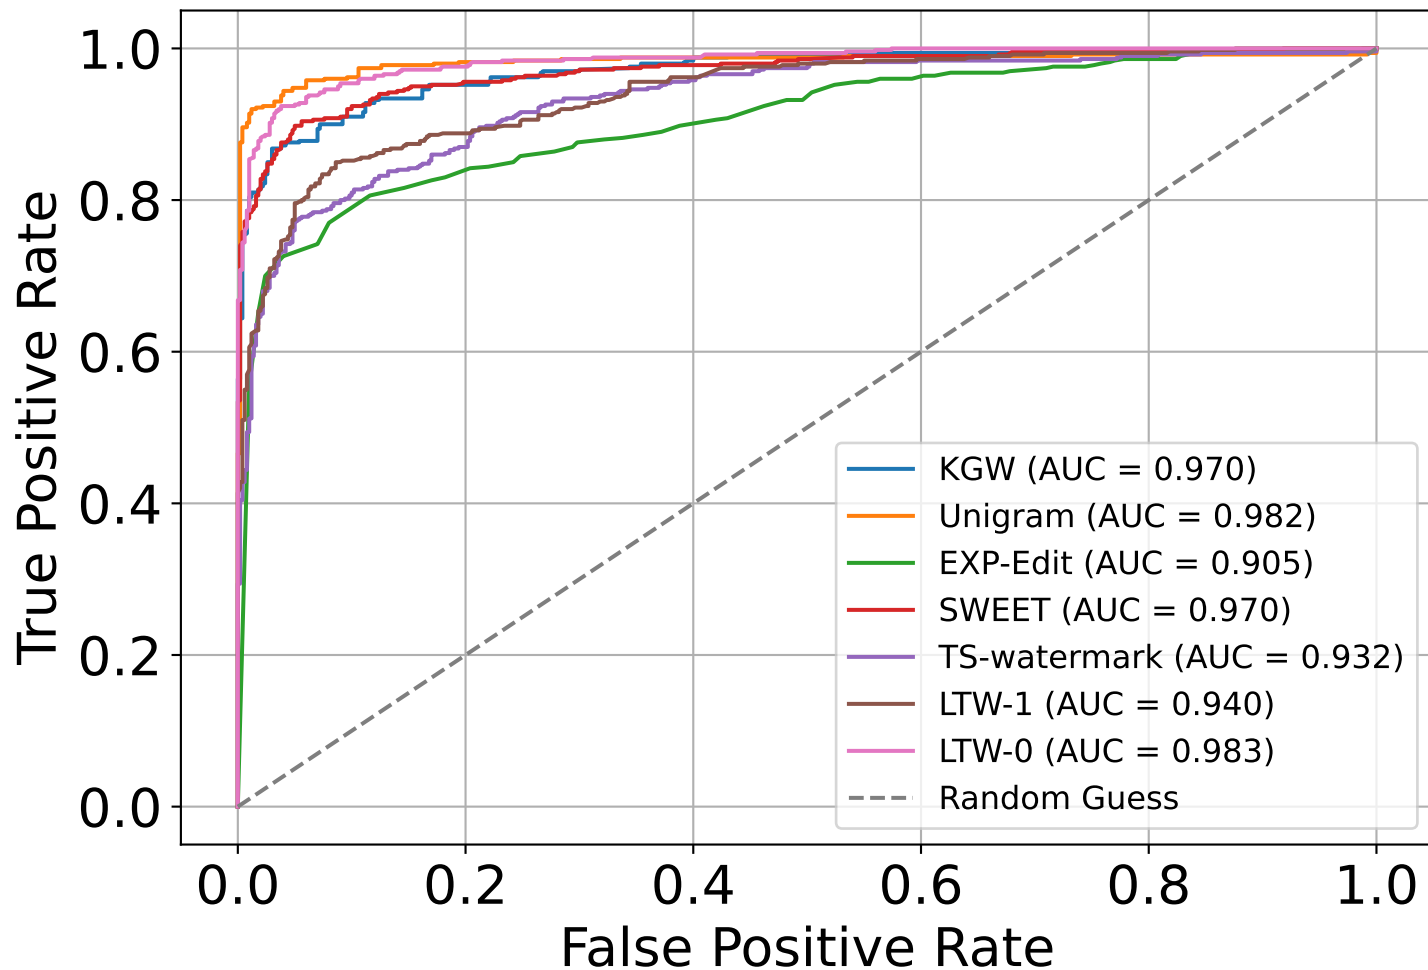

Supplement: supplementary_material [file dipper_auroc_opt.pdf › LTW/eval/dipper_auroc_opt.pdf]

FPR=10%

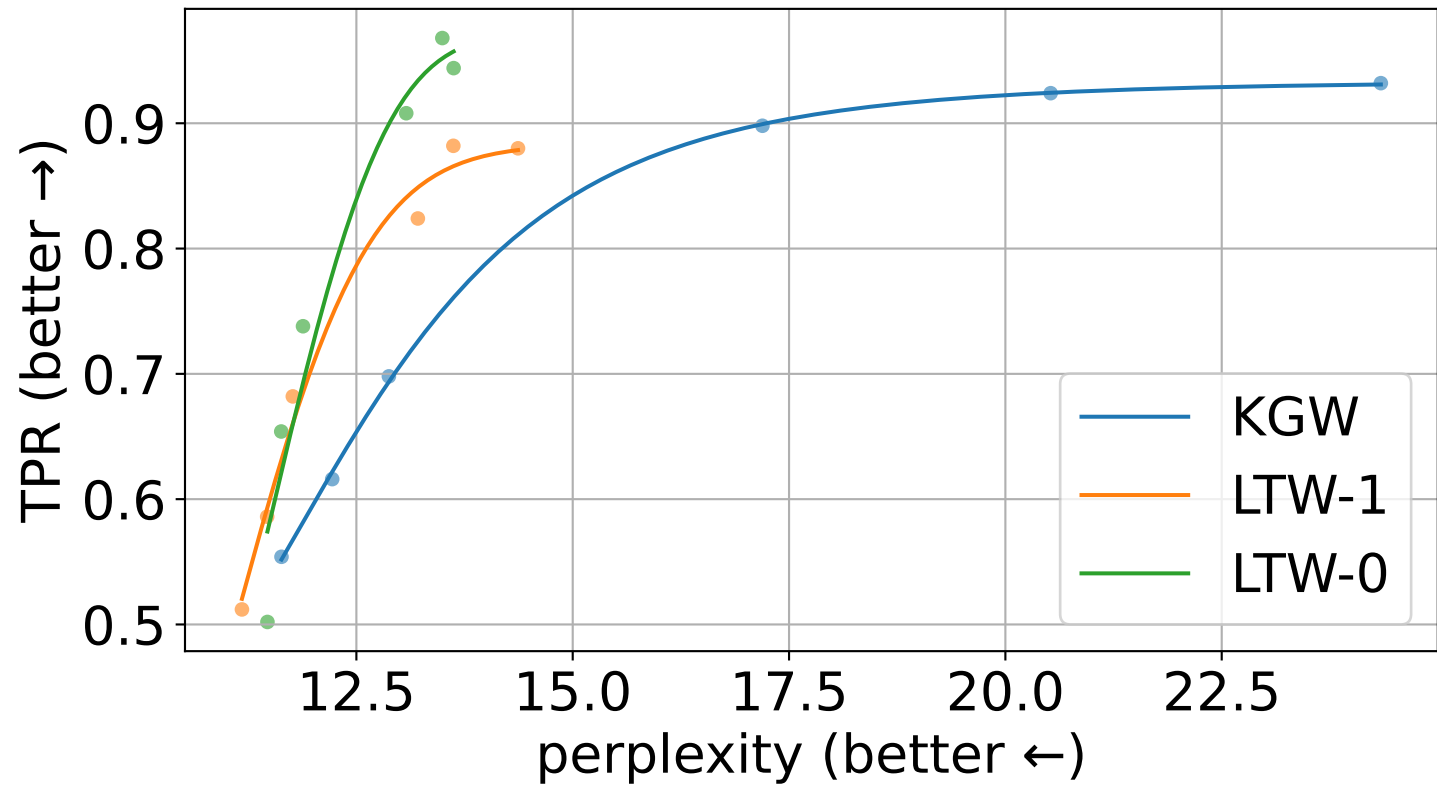

Supplement: supplementary_material [file dipper_plot.pdf › LTW/eval/dipper_plot.pdf]

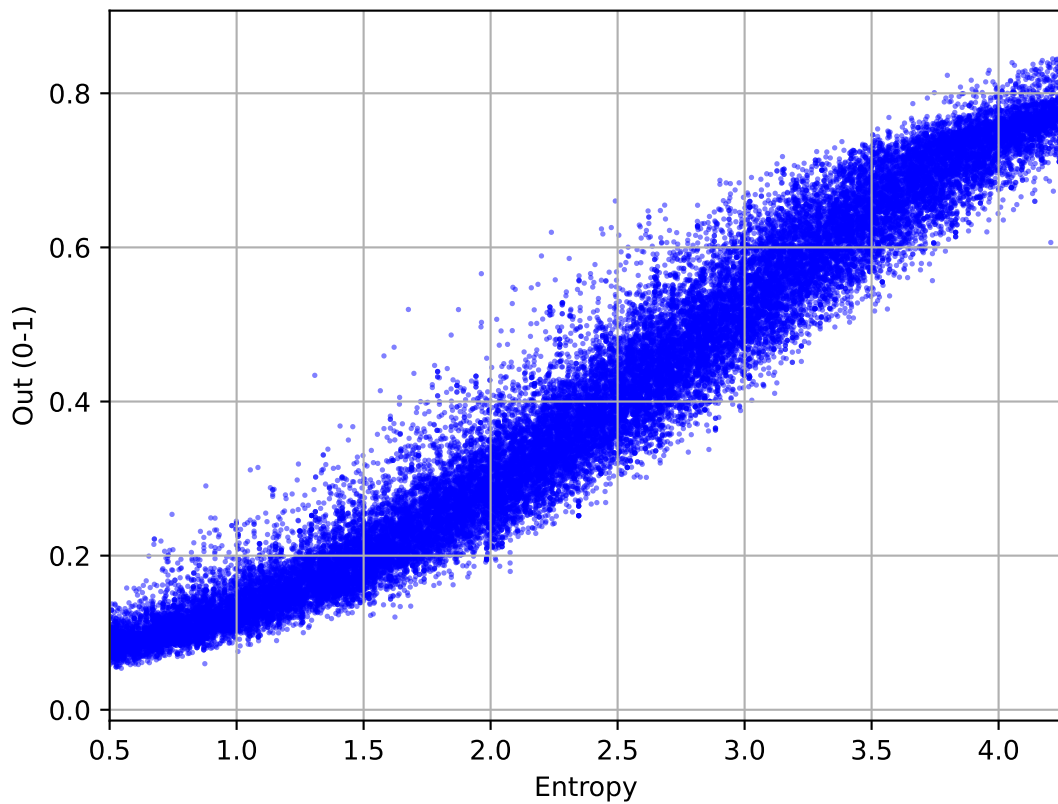

Supplement: supplementary_material [file plot1.pdf › LTW/eval/plot1.pdf]

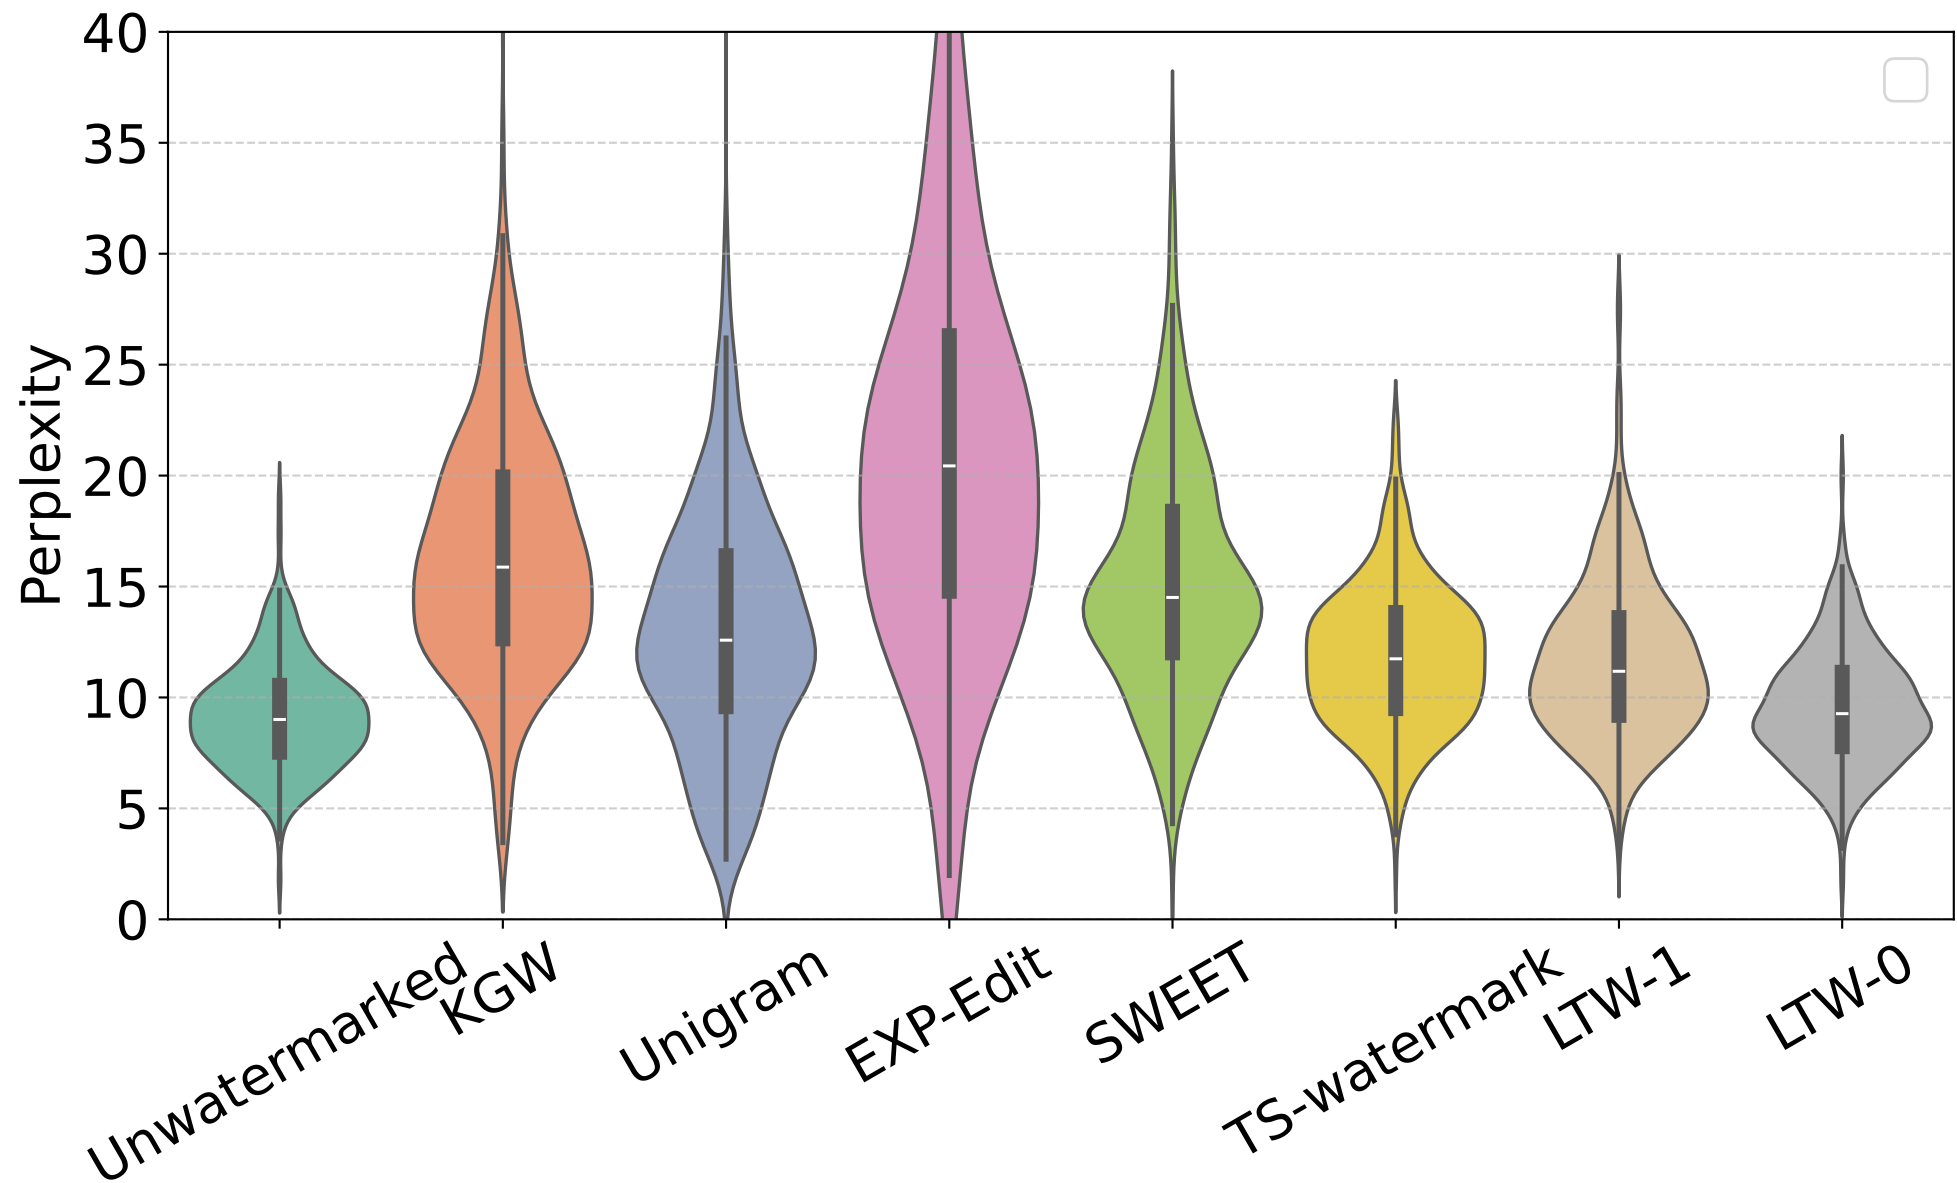

Supplement: supplementary_material [file ppl_gptj.pdf › LTW/eval/ppl_gptj.pdf]

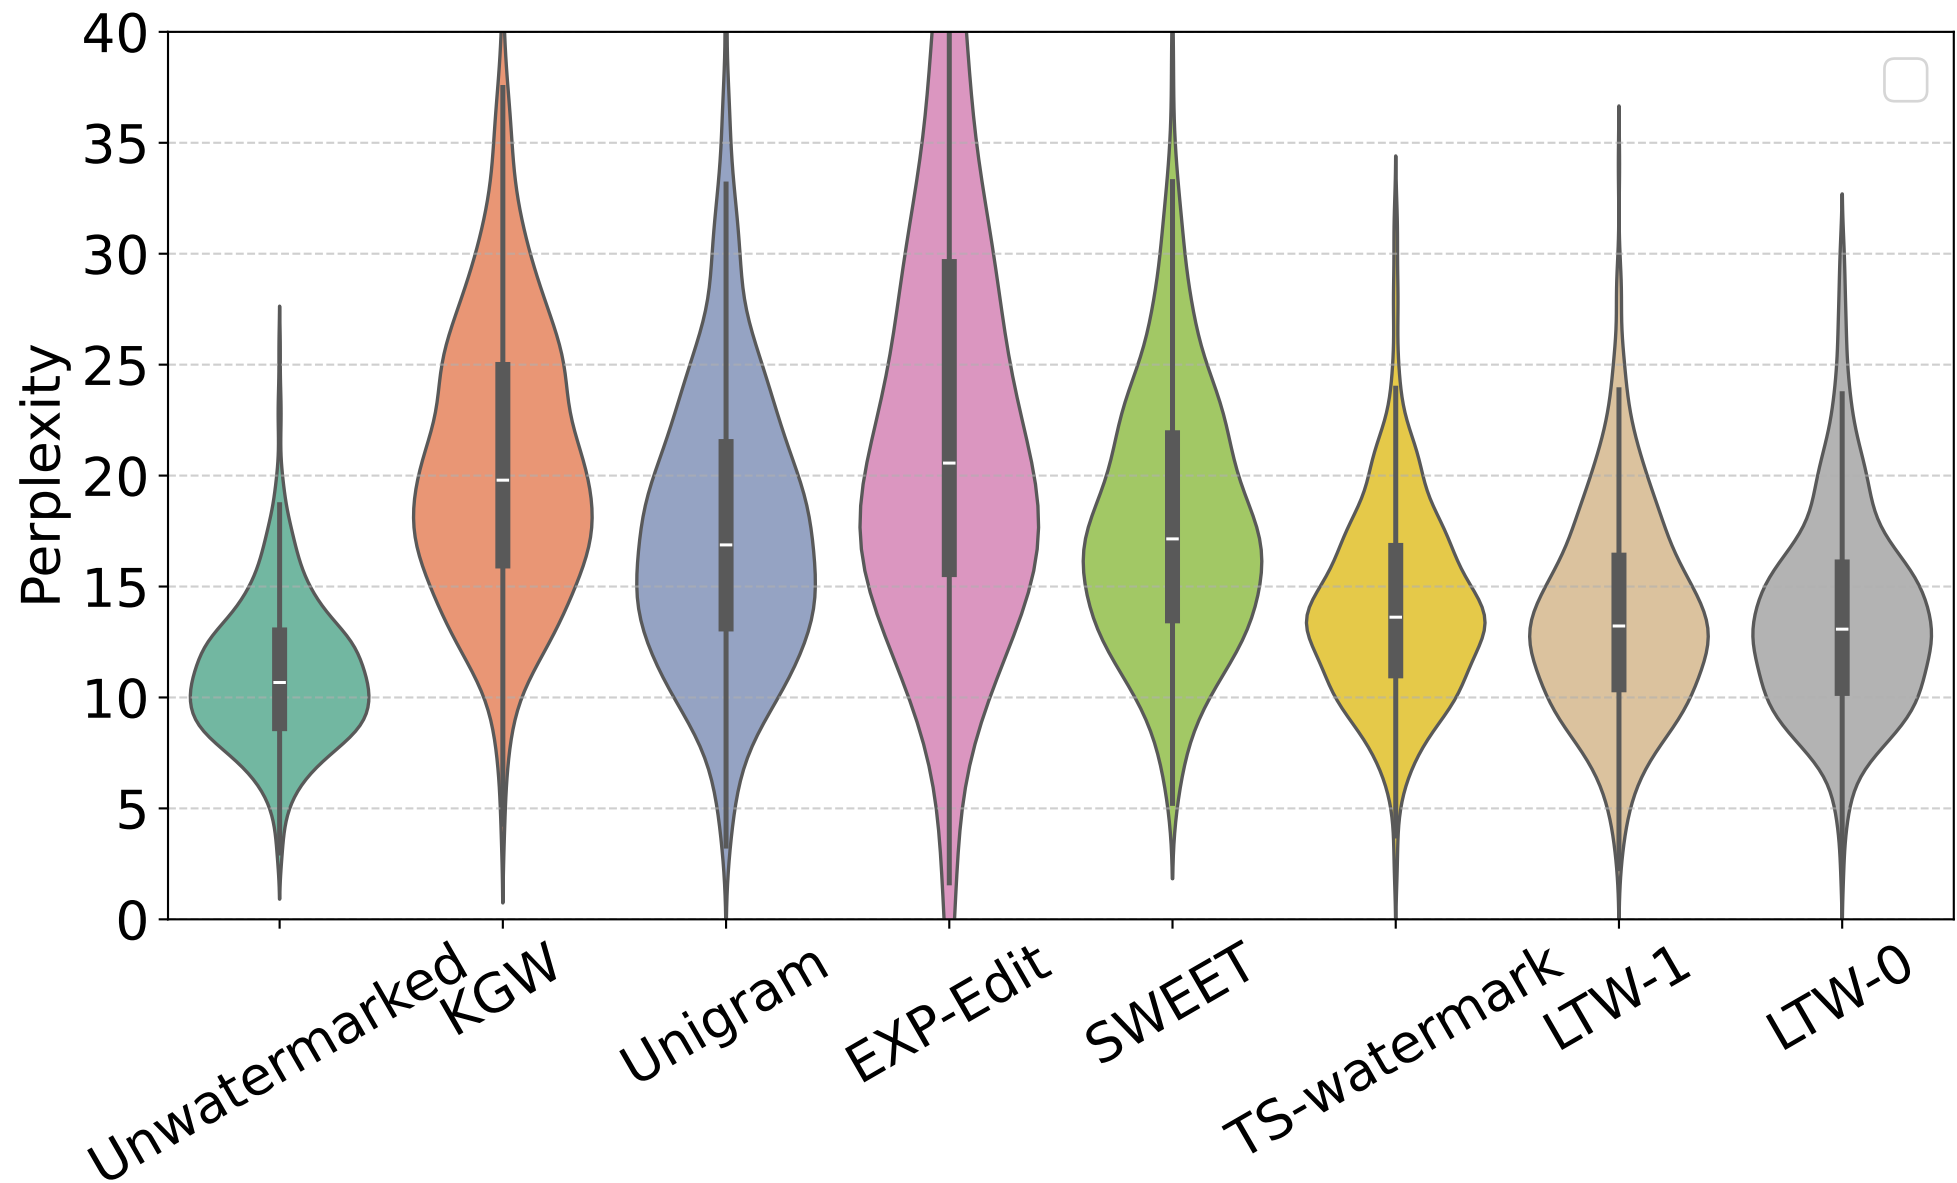

Supplement: supplementary_material [file ppl_opt.pdf › LTW/eval/ppl_opt.pdf]

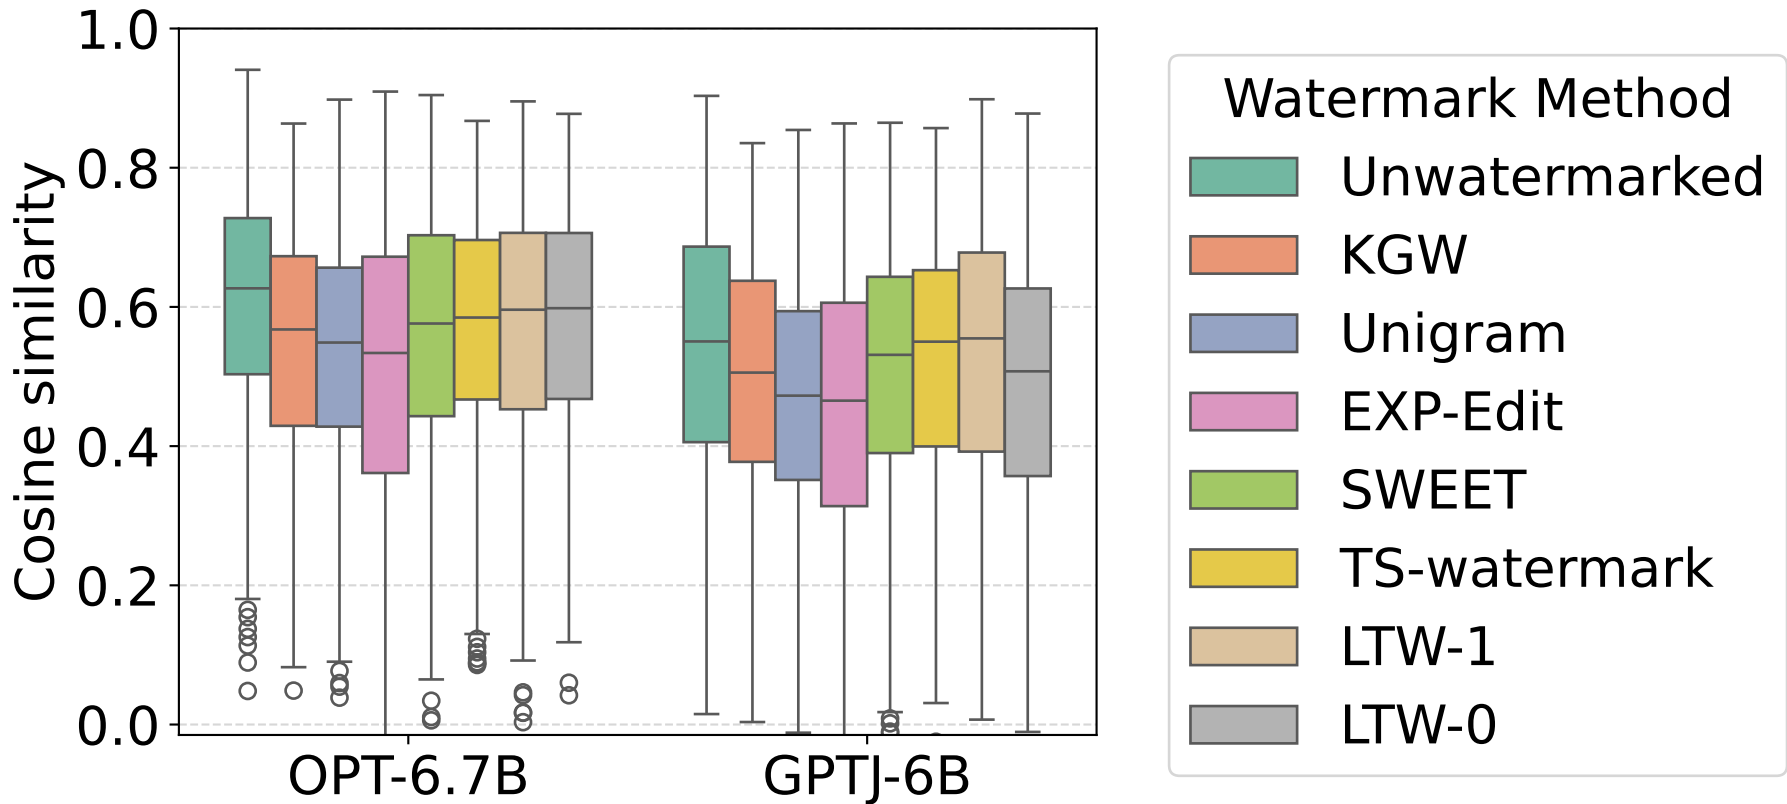

Supplement: supplementary_material [file sim_across_models.pdf › LTW/eval/sim_across_models.pdf]

FPR=1%

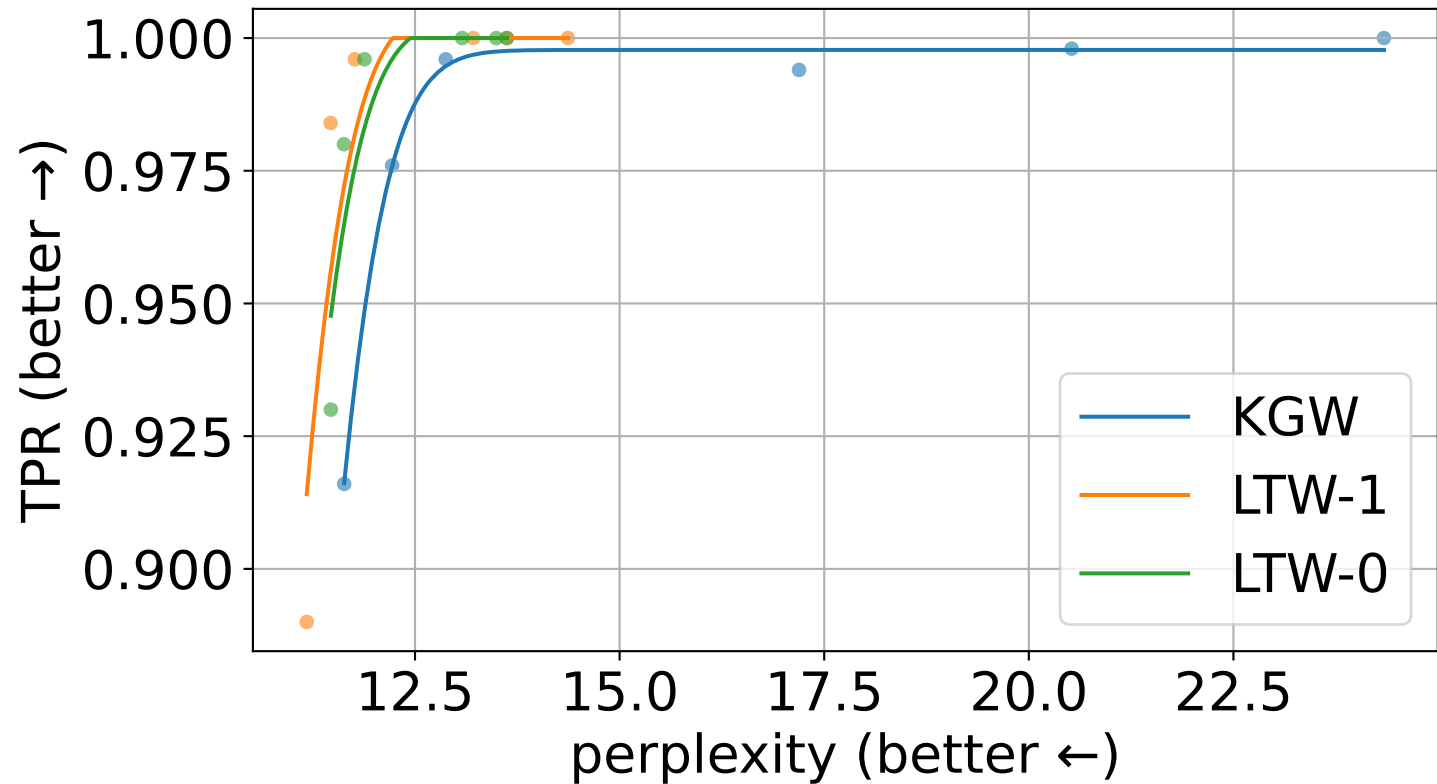

Supplement: supplementary_material [file tpr_plot.pdf › LTW/eval/tpr_plot.pdf]
